# Supplementary material
Source: publisher figshare collection journal article supplement (https://acs.figshare.com/ndownloader/files/4535677)
Supplement: Supplementary file 1 [file 4535677]

# Facile Synthesis and 1D Assembly of Cyclodextrin-Capped Gold Nanoparticles and Their Applications in Catalysis and SERS

Teng Huang, Fei Meng, and Limin Qi\*

*Beijing National Laboratory for Molecular Sciences (BNLMS), State Key Laboratory for Structural Chemistry of Unstable and Stable Species, College of Chemistry, Peking University, Beijing 100871, People's Republic of China. E-mail: liminqi@pku.edu.cn.*

## Supporting Information

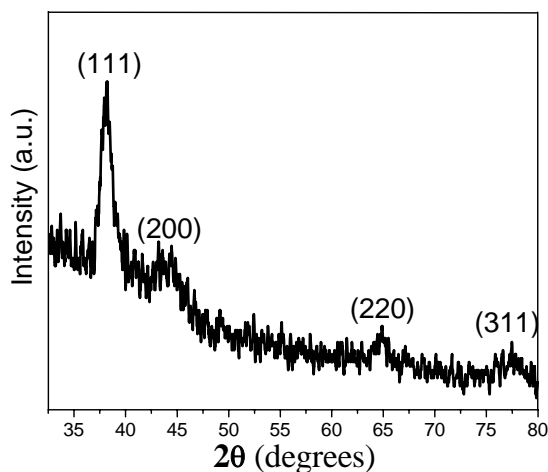

**Figure S1.** XRD pattern of the  $\alpha$ -CD-capped 20 nm-Au nanoparticles.

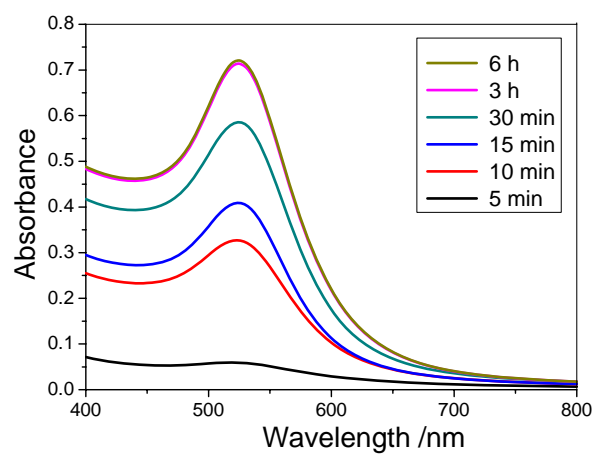

**Figure S2.** Successive increase of the SPR band of the  $\alpha$ -CD-capped 20 nm-Au nanoparticles with the increase in reaction time from 5 min to 6 h.

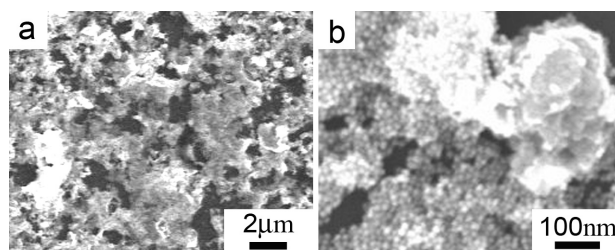

**Figure S3.** SEM images of random aggregates of the  $\alpha$ -CD-capped 20 nm-Au nanoparticles.
